# Supplementary material for: Pre‐saccadic shifts of attention in individuals diagnosed with schizophrenia
Source: PubMed Central journal article supplement (PMC10918725; doi:10.1002/brb3.3466), 2024-03-07

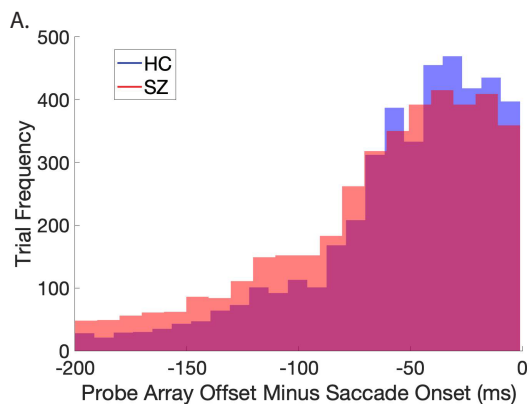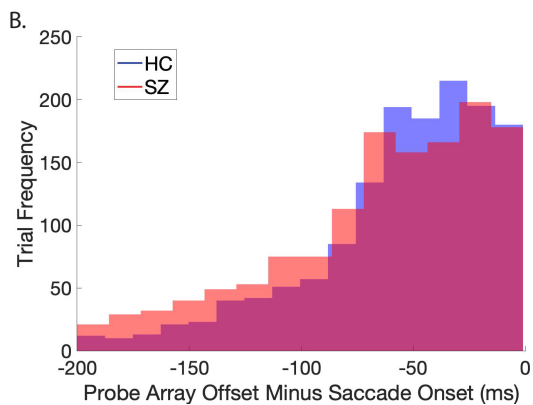

Supplement: BRB3-14-e3466-s004.pdf [file BRB3-14-e3466-s004.pdf]
